# Supplementary material for: Combining biomimetic collagen/hyaluronan hydrogels with discogenic growth factors promotes mesenchymal stroma cell differentiation into Nucleus Pulposus like cells
Source: Royal Society of Chemistry journal article supplement (doi:10.1039/d3bm01025b), 2023-01-01
Supplement: d3bm01025b1.pdf [file d3bm01025b1.pdf]

## Electronic Supplementary Information

### **Combining biomimetic collagen/hyaluronan hydrogels with discogenic growth factors promotes mesenchymal stroma cell differentiation into Nucleus Pulposus like cells**

Prince David Okoro<sup>†a</sup>, Antoine Frayssinet<sup>†a</sup>, Stéphanie De Oliveira<sup>a</sup>, Léa Rouquier, Gregor Milkosic, Matteo D'Este, Esther Potier, Christophe Héлары\*

<sup>a</sup> Laboratoire de Chimie de la Matière Condensée de Paris, Sorbonne Université, CNRS, UMR 7574, F-75005, Paris, France.

<sup>c</sup> Université Paris Cité, CNRS, INSERM, B3OA, Paris, France.

<sup>b</sup> AO Research Institute Davos (ARI), Clavadelerstrasse 8, 7270 Davos, Switzerland

\* Corresponding authors: Christophe Héлары

Email address : [christophe.helary@sorbonne-universite.fr](mailto:christophe.helary@sorbonne-universite.fr)

Telephone: +33144276539

Postal address: Sorbonne University - Campus Pierre et Marie Curie, 4 place Jussieu, 75252 Paris Cedex 05, France

<sup>†</sup> These authors have contributed equally to this work

Gel formulation/tube (i.e. 6 replicates)

|          |                    |                 |                    |               |                        |                           |                                         |
|----------|--------------------|-----------------|--------------------|---------------|------------------------|---------------------------|-----------------------------------------|
| Collagen | PBS 10x<br>[600ul] | NaOH<br>[240ul] | PBS 1x<br>[2416.8] | ✘             | ✘                      | Coll.<br>[2743.2]<br>0.4% | ✘                                       |
| 1:2      | PBS 10x<br>[600ul] | NaOH<br>[240ul] | PBS 1x<br>[1347]   | HRP<br>[30ul] | THA<br>[799.8]<br>0.8% | Coll.<br>[2743.2]<br>0.4% | H <sub>2</sub> O <sub>2</sub><br>[240u] |
| 1:5      | PBS 10x<br>[600ul] | NaOH<br>[240ul] | PBS 1x<br>[147]    | HRP<br>[30ul] | THA<br>[1999.8]<br>2%  | Coll.<br>[2743.2]<br>0.4% | H <sub>2</sub> O <sub>2</sub><br>[240u] |
| HA       | ✘                  | ✘               | PBS 1x<br>[3730.2] | HRP<br>[30u]  | THA<br>[1999.8]<br>2%  | ✘                         | H <sub>2</sub> O <sub>2</sub><br>[240u] |

X 4 time-points!

- 600ul cell suspension/tube at 500k/gel
- 6 replicates/condition in 15ml tubes

|        |         |                           |
|--------|---------|---------------------------|
| ACAN   | Forward | TCGAGGACAGCGAGGCC         |
|        | Reverse | TCGAGGGTGTAGCGTAGAGA      |
| COL2A1 | Forward | CAGACGCTGGTGCTGCT         |
|        | Reverse | TCCTGGTTGCCGGACAT         |
| COL1A1 | Forward | CCAGTCAGAGTGGCACATCTTGA   |
|        | Reverse | GCTCACGATGGTGCCGCTACTA    |
| SOX 9  | Forward | AGGTGCTCAAAGGCTACGAC      |
|        | Reverse | GTAATCCGGGTGGTCCTTCT      |
| COL 10 | Forward | GTGGACCAGGAGTACCTTGC      |
|        | Reverse | TGCTGCCACAAATACCCTTT      |
| IBSP   | Forward | AACGAACAAGGCATAAACGGCACCA |
|        | Reverse | CTTGCCCTGCCTTCCGGTCT      |
| KRT18  | Forward | AAAGGCCTACAAGCCCAGAT      |
|        | Reverse | CACTGTGGTGCTCTCCTCAA      |
| GAPDH  | Forward | TTGATTTTGGAGGGATCTCG      |
|        | Reverse | GAGTCAACGGATTGGTCGT       |

Supplementary information N°2: List of primers for Q-PCR

Pure Collagen

Collagen/THA  
1:2 Ratio

Collagen/THA  
1:5 Ratio

Pure THA

Day 28

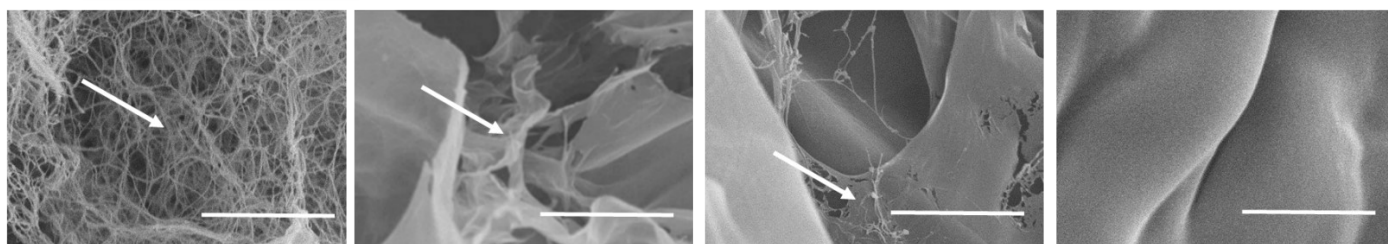

Supplementary Information N°3: Ultrastructure of acellular collagen/THA composite hydrogels observed by scanning electron microscopy after 1 28 days of culture in differentiation medium. Hydrogel surface observed after hydrogel fracture. White arrows show collagen fibrils. Scale Bar: 5  $\mu$ m.

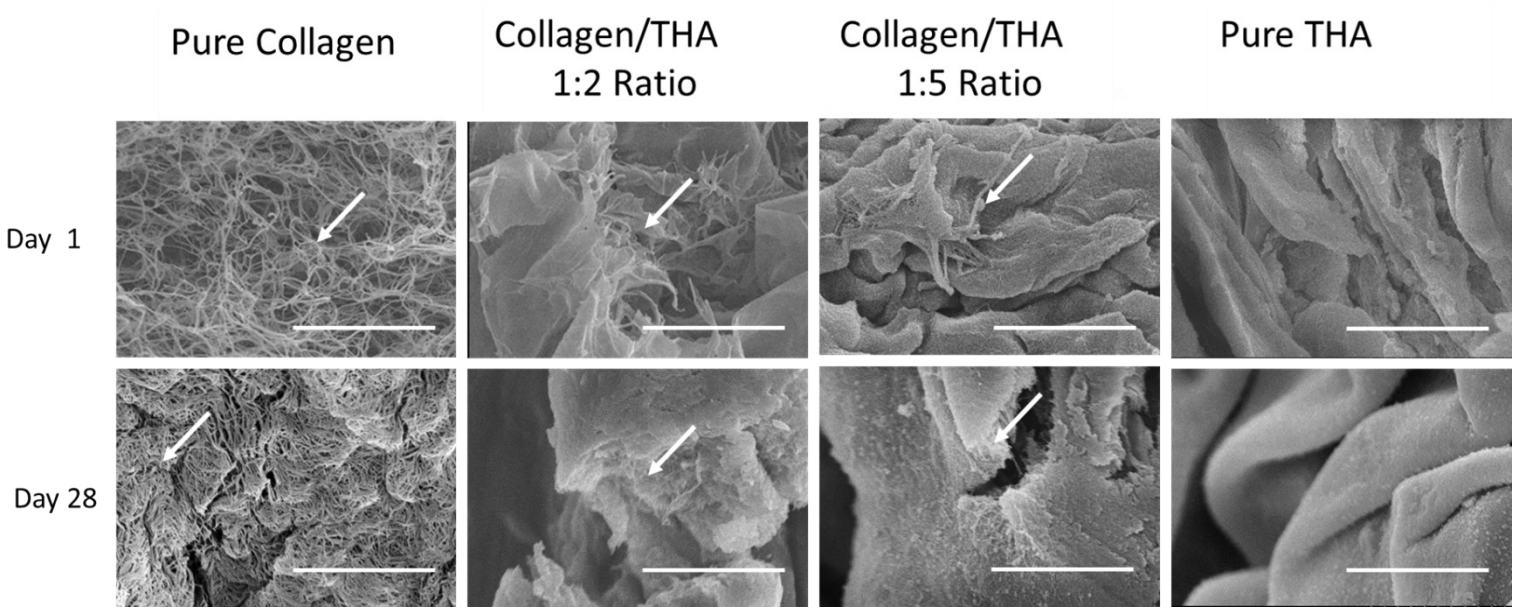

Supplementary Information N°4: Ultrastructure of cellularized collagen/THA composite hydrogels observed by scanning electron microscopy after 1 day (top) or 28 days (bottom) of culture in differentiation medium. Hydrogel surface observed after hydrogel fracture. White arrows show collagen fibrils. Scale Bar: 5  $\mu$ m.

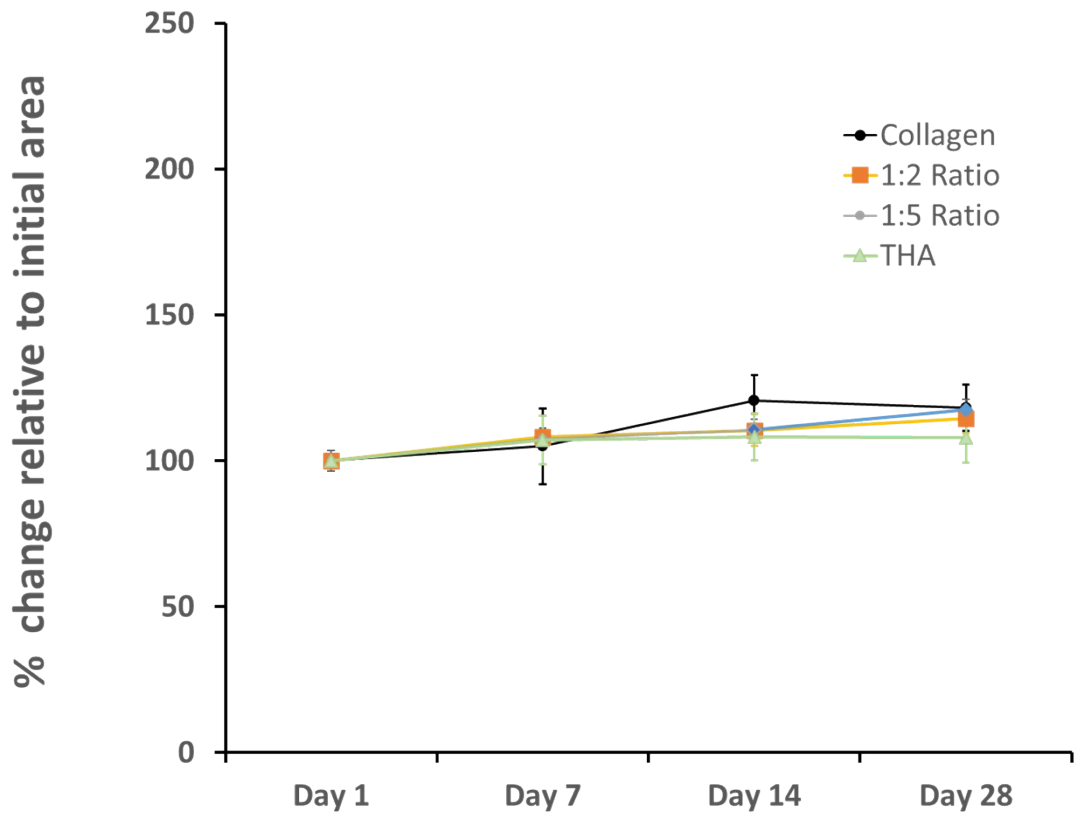

Supplementary Information N°5: Changes in surface area of acellular composite hydrogels cultured in differentiation medium over 28 days. Results expressed as a percentage of the initial area +/- SD (n=6).

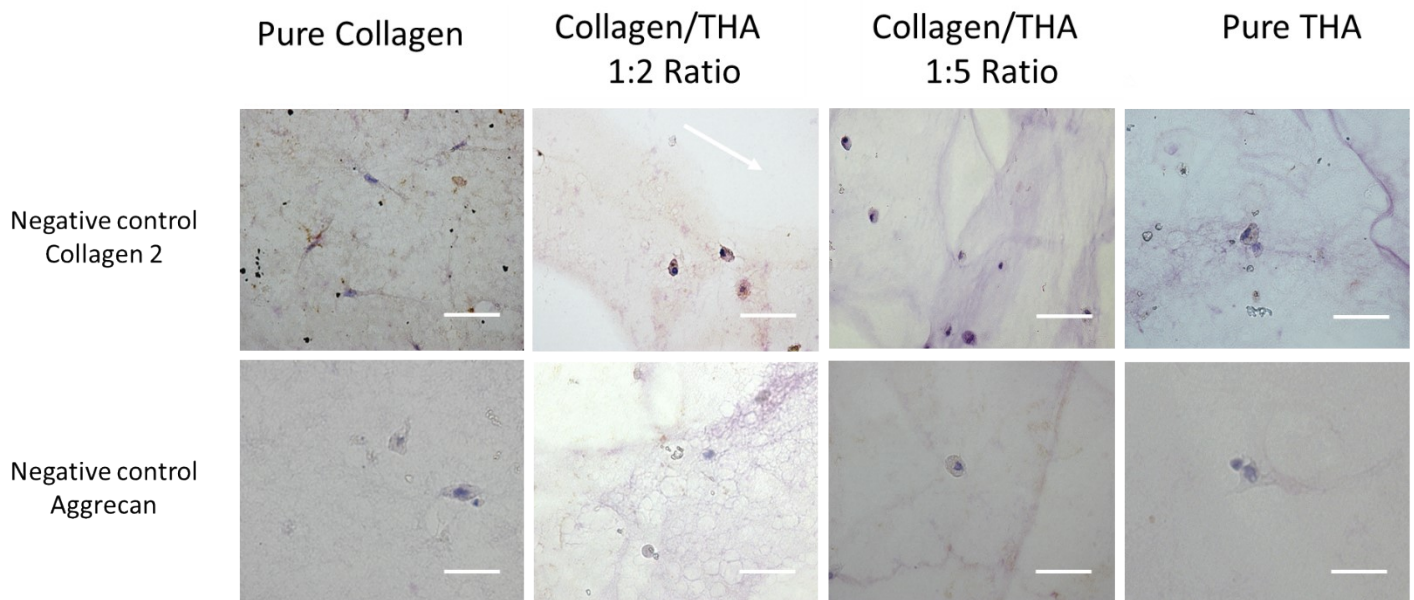

Supplementary Information N°6: Negative controls carried out on histological sections by omitting the primary antibody (anti collagen 2 or anti-aggrecan) to show the antibody specificity. Sections were counterstained with Mayer's Hematoxyline to visualize BM-MSCs. Negative controls performed on cellularized hydrogels after 14 days in culture in differentiation medium.
